# Supplementary material
Source: PubMed Central journal article supplement (PMC5509997)
Supplement: EMBJ-36-2061-s001.pdf [file EMBJ-36-2061-s001.pdf]

### Expanded View Figures

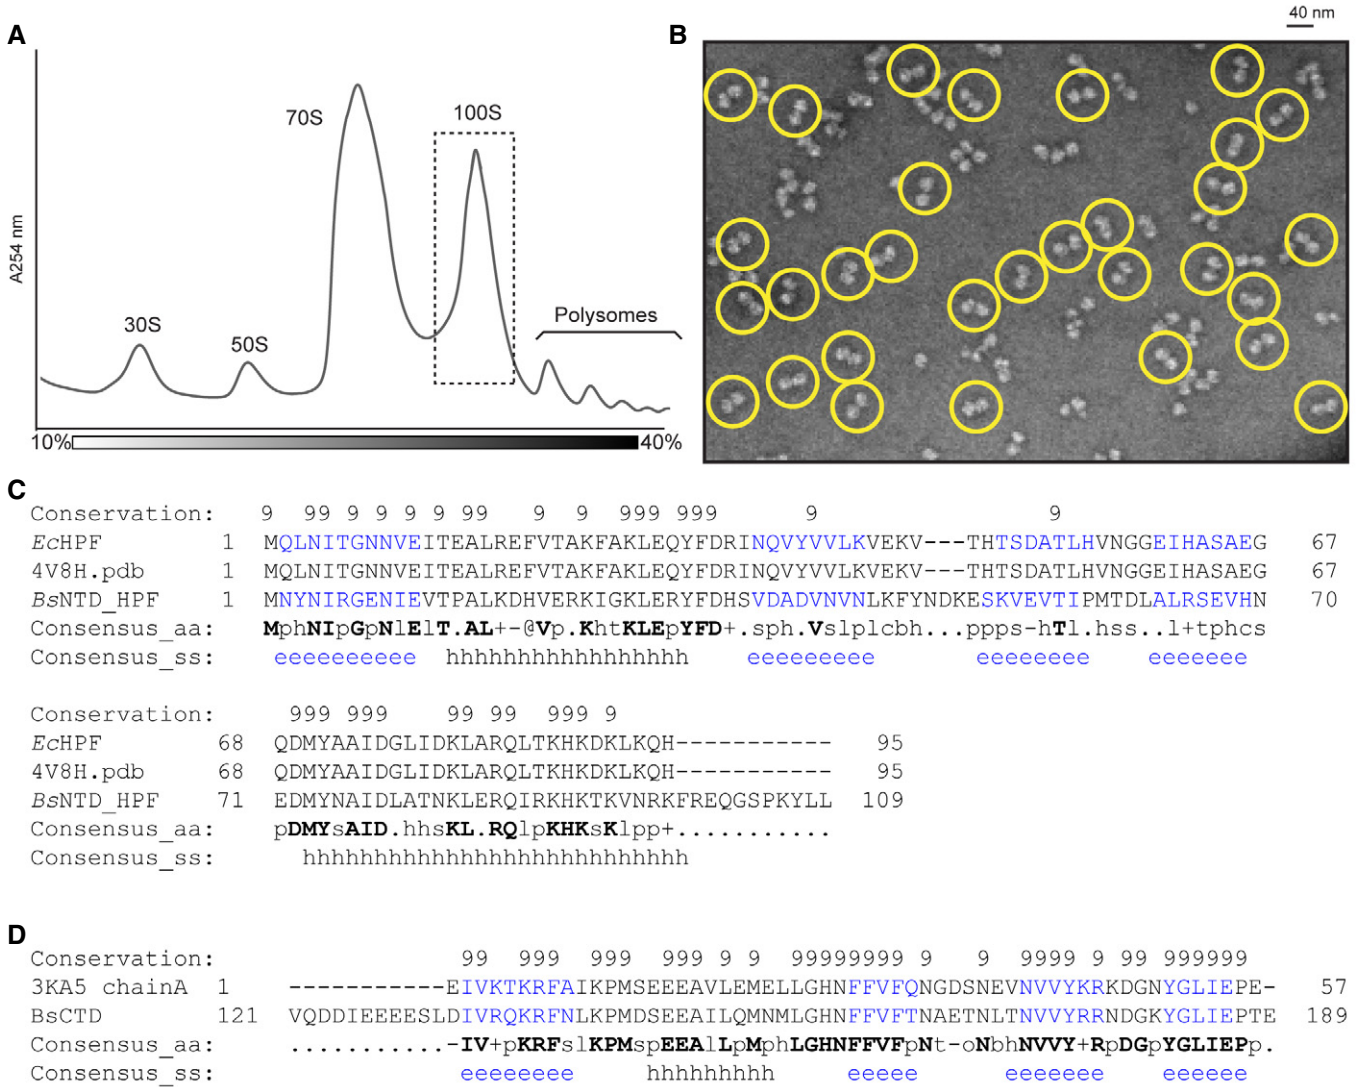

**Figure EV1. Isolation of *Bacillus subtilis* 100S and sequence alignments of BsHPF with EcHPF-NTD and CaCTD.**

A Sucrose density gradient profile of *B. subtilis* extract from late log phase cells, with 30S, 50S, 70S, 100S, and polysome peaks indicated.

B Negative stain electron microscopy images of purified Bs100S from (A), with selected 70S dimers circled in yellow.

C PROMALS3D (Pei et al, 2008) sequence alignment of BsHPF-NTD with *Escherichia coli* HPF (PDB 4V8H) (Polikanov et al, 2012) that was used to generate the homology model for BsHPF-NTD.

D PROMALS3D (Pei et al, 2008) sequence alignment of BsHPF-CTD with *Clostridium acetobutylicum* HPF-CTD (CaCTD; PDB ID 3KA5) that was used to generate the homology model for BsHPF-CTD.

Data information: In (C) and (D), fully conserved residues are indicated with "9" and are bold in the Consensus\_aa, whereas similar residues are indicated with a "+". Consensus\_ss indicates β-sheet (e) and helical (h) regions.

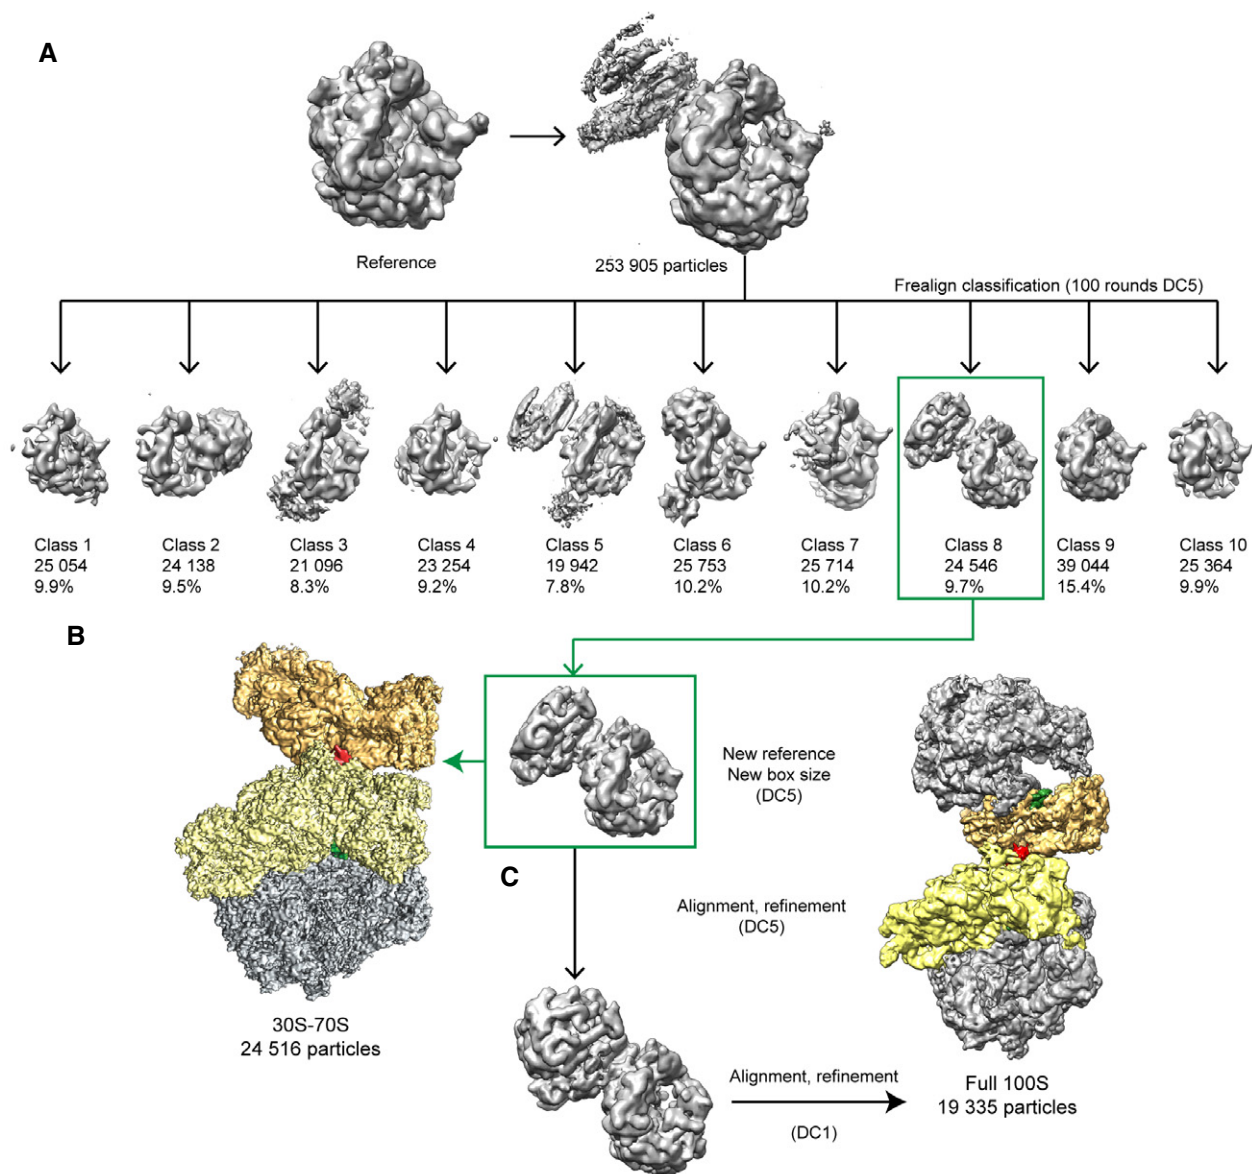

**Figure EV2. *In silico* sorting and refinement scheme for the *Bs*70S-30S subcomplex and complete *Bs*100S.**

A–C 253,905 particles were sorted into 10 classes. Class 8 had the most defined density for the 70S-B and was taken for further refinement using (B) a box size that includes the 70S-A ribosome and the 30S part of the 70S-B, and (C) a larger box size that encompasses both the 70S-A and 70S-B ribosomes.

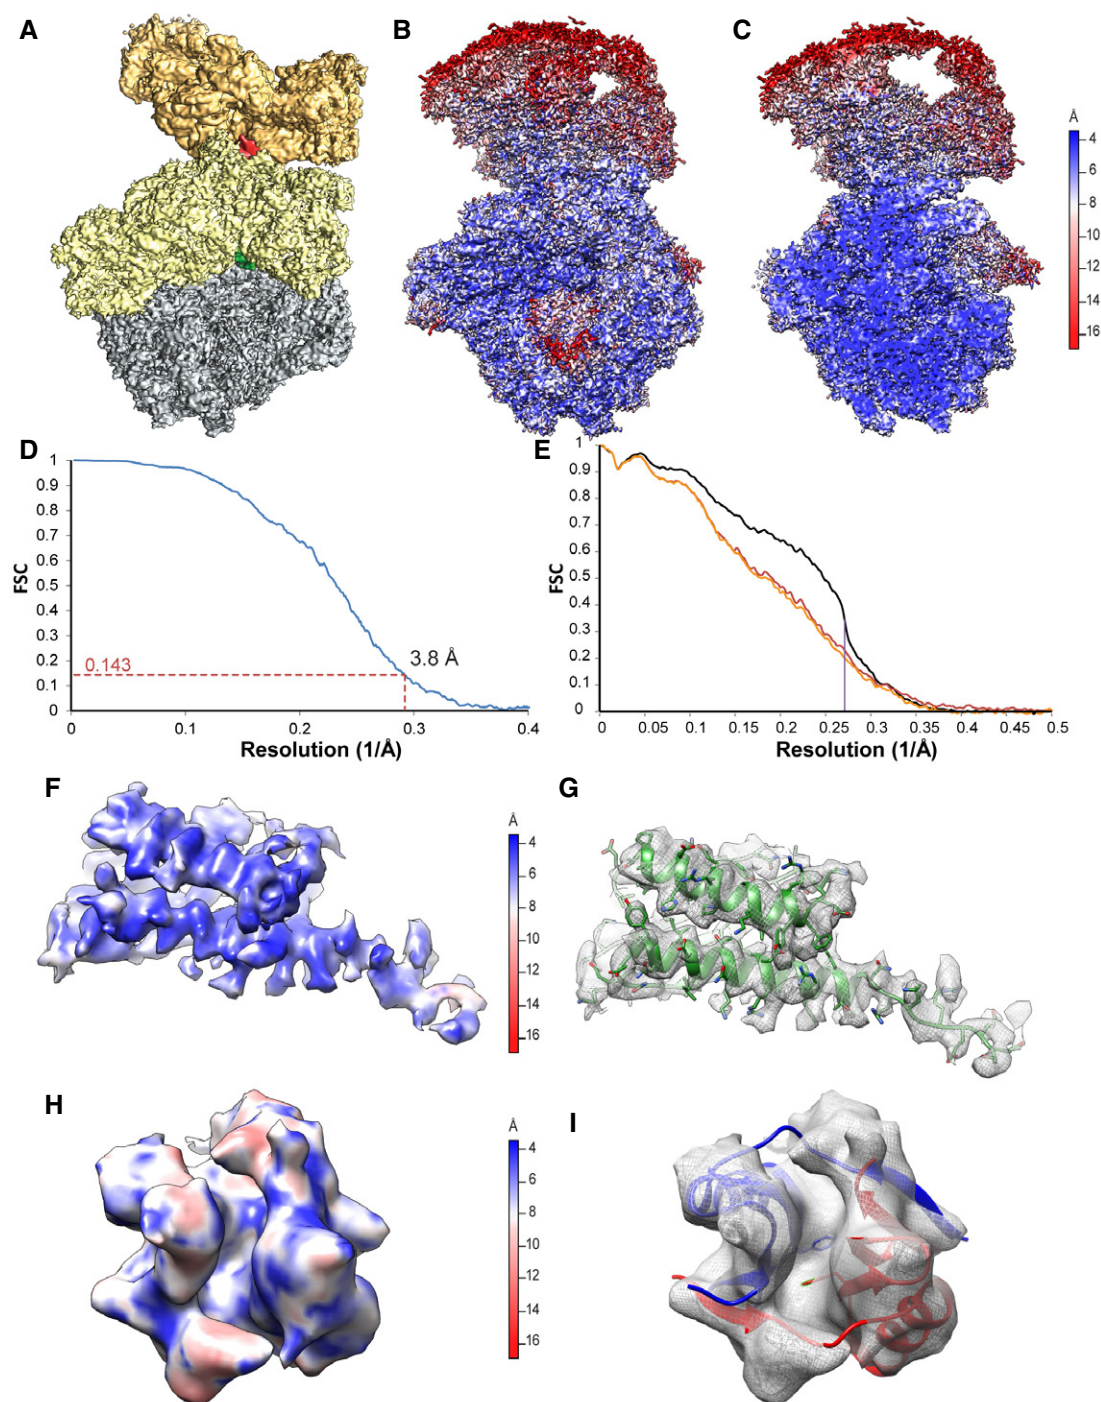

**Figure EV3. Resolution of 70S-A in the *Bs*70S-30S subcomplex.**

- A Overview of the *Bs*70S-30S subcomplex with 30S-A (yellow), 50S-A (gray), and 30S-B (orange), as well as *Bs*HHPF-NTD (green) and *Bs*HHPF-CTD (red).
- B, C Overview (B) and transverse section (C) of the *Bs*70S-30S subcomplex colored according to the local resolution, as calculated using ResMap (Kucukelbir *et al.*, 2014).
- D Fourier-shell correlation curve of the refined cryo-EM map, indicating the average resolution of 70S-A in the *Bs*70S-30S subcomplex is 3.8 Å.
- E Fit of models to maps. FSC curves calculated between the refined model and the final map (black), with the self- and cross-validated correlations in orange and red, respectively. Information beyond 4 Å was not used during refinement and preserved for validation.
- F–I Map density for the (F, G) *Bs*HHPF-NTD and (H, I) *Bs*HHPF-CTD, which are (F, H) colored according to the local resolution, as calculated using ResMap (see Materials and Methods), or (G, I) shown as a gray mesh with molecular models (G) for *Bs*HHPF-NTD (green) or (I) *Bs*HHPF-CTD for 70S-A (red) and 70S-B (blue), using the same respective view as in (F, H).

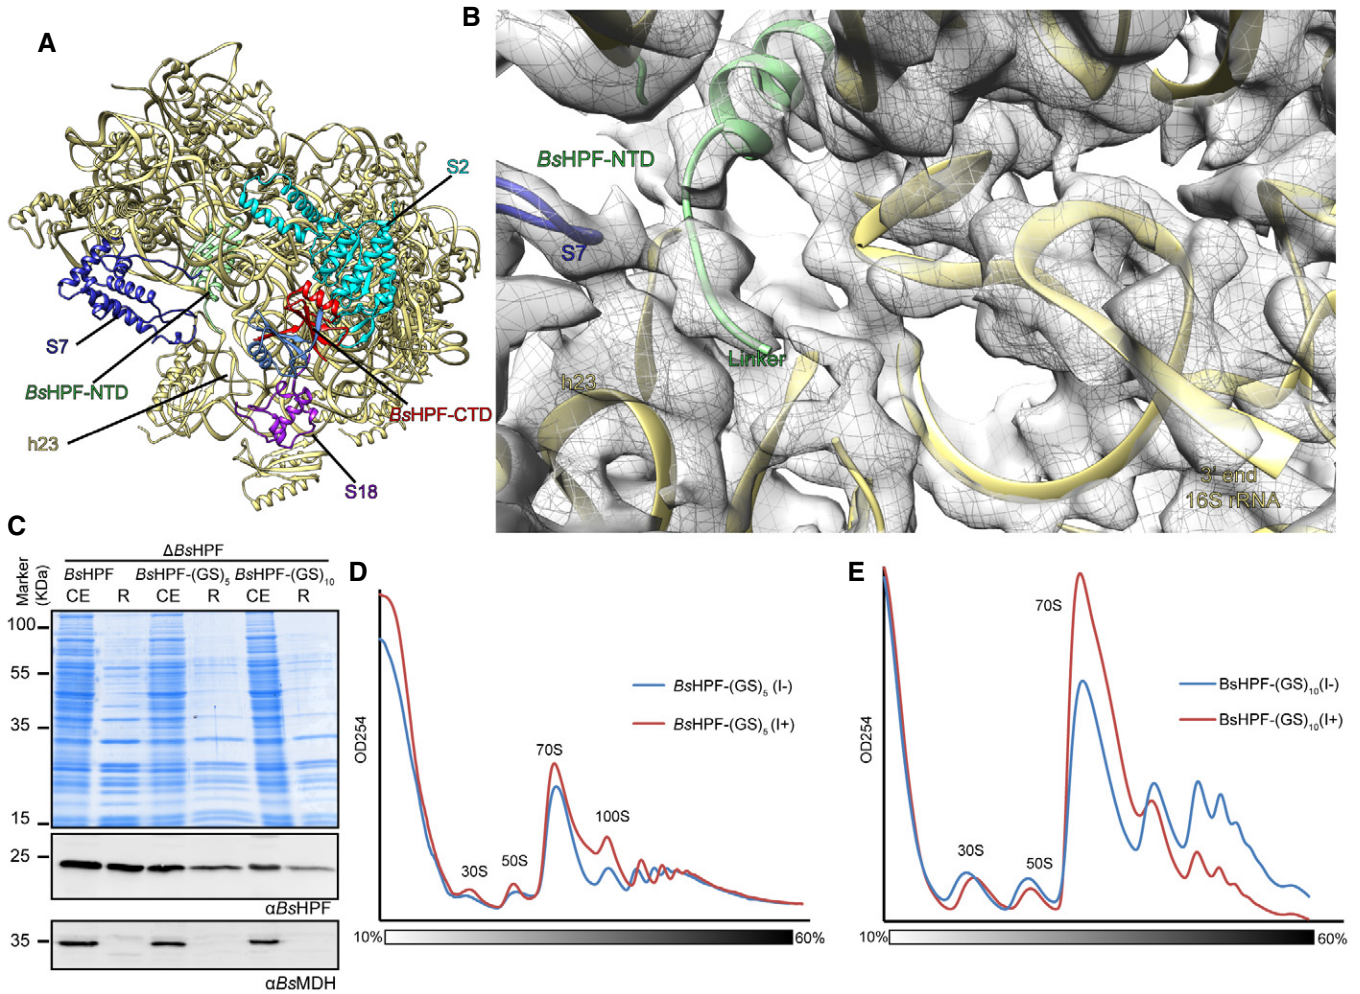

**Figure EV4. BsHPF linker region approaches the 30S platform cavity.**

- A Overview of the 30S cavity region showing BsHPF-NTD (green) and BsHPF-CTD (red) and 30S (yellow), except S2 (cyan), S7 (blue), and S18 (purple).
- B Zoom of (A), showing map density (gray mesh) for the N-terminal part of the linker region of BsHPF (green) as well as for the 3' end of the 16S rRNA.
- C Coomassie (upper panel) and Western blot of cell extracts (CE) and ribosome pelleted fractions (R) of the wild-type Bs168 (wt) strain or the  $\Delta$ BsHPF strains expressing either wild-type BsHPF, BsHPF-(GS)<sub>5</sub>, or BsHPF-(GS)<sub>10</sub>.
- D, E Sucrose gradient profiles of cell extracts from the (D) Bs168  $\Delta$ BsHPF amyE::BsHPF-(GS)<sub>5</sub> strain and (E) Bs168  $\Delta$ BsHPF amyE::BsHPF-(GS)<sub>10</sub> strain, in the absence (I-) or presence (I+) of IPTG.

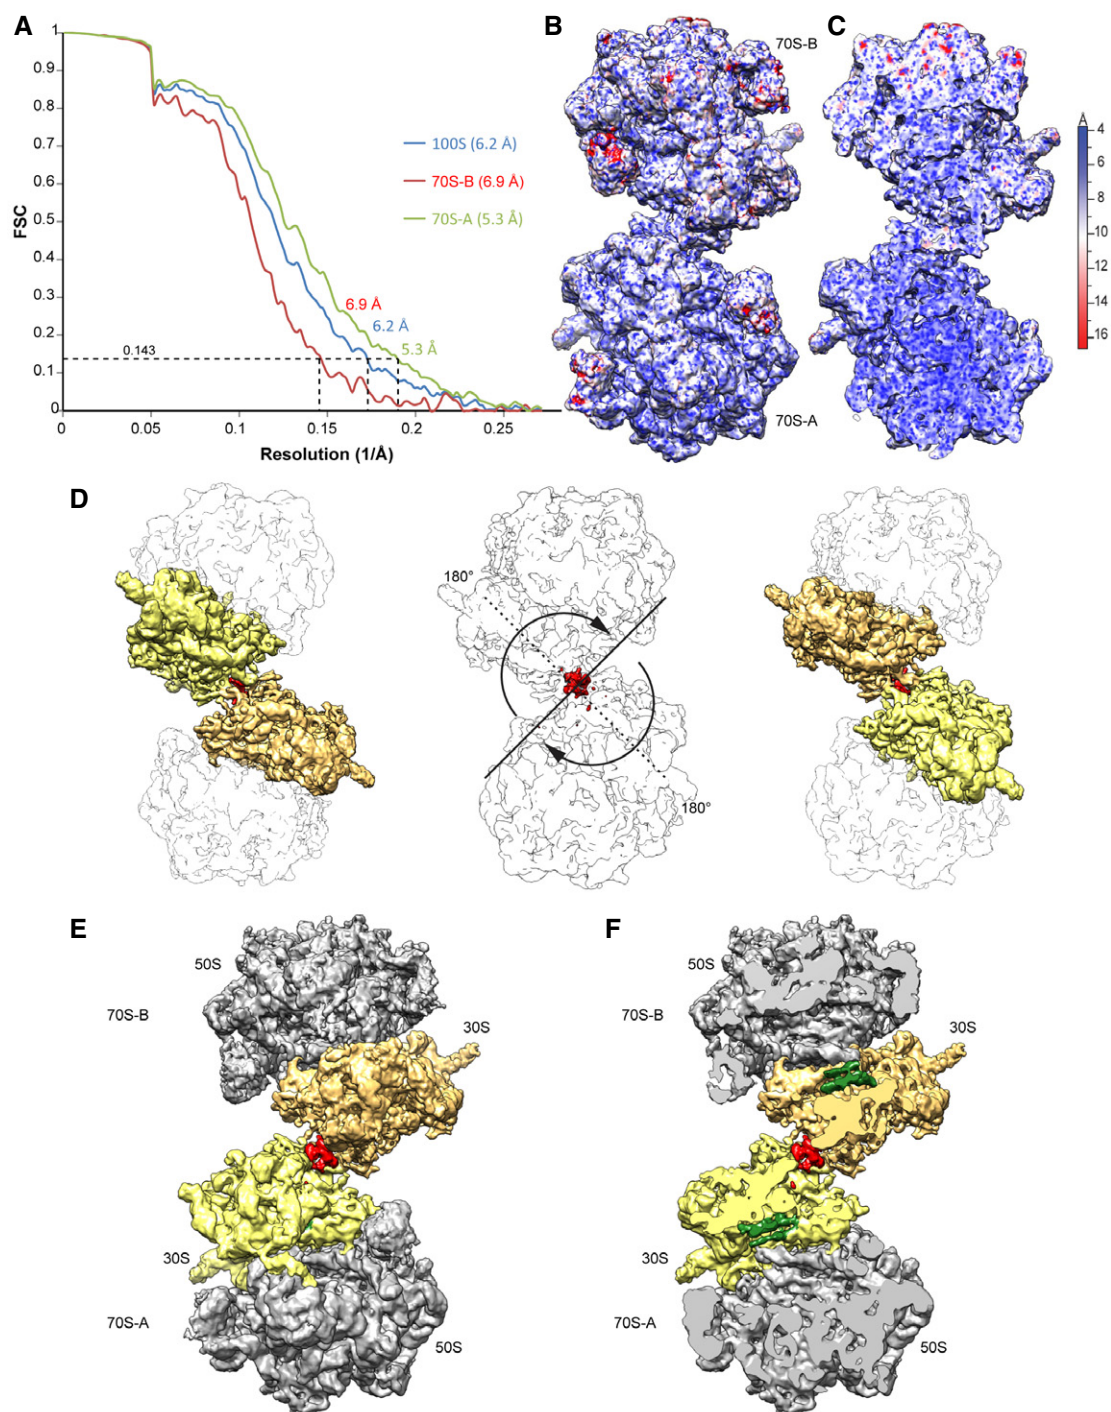

**Figure EV5. Resolution of the complete dimeric *Bs*100S.**

- A Fourier-shell correlation curve of the refined cryo-EM map, indicating the average resolution of 70S-A, 70S-B, and the complete *Bs*100S is 5.3, 6.9 and 6.2 Å, respectively.
- B, C Cryo-EM map of the dimeric *Bs*100S colored according to local resolution showing (B) overview and (C) transverse section of the complete 100S disome.
- D The 70S-A and 70S-B monomers in the *Bs*100S are related by rotational symmetry of ~180°.
- E, F Cryo-EM map of the (E) dimeric *Bs*100S with 30S-A (yellow), 30S-B (orange) and 50S (gray), and (F) transverse section of (E) highlighting the densities for the *Bs*HPPF-NTD (green) and *Bs*HPPF-CTD (red).
