# Supplementary material
Source: PubMed Central journal article supplement (PMC5509997)

Figure 5A

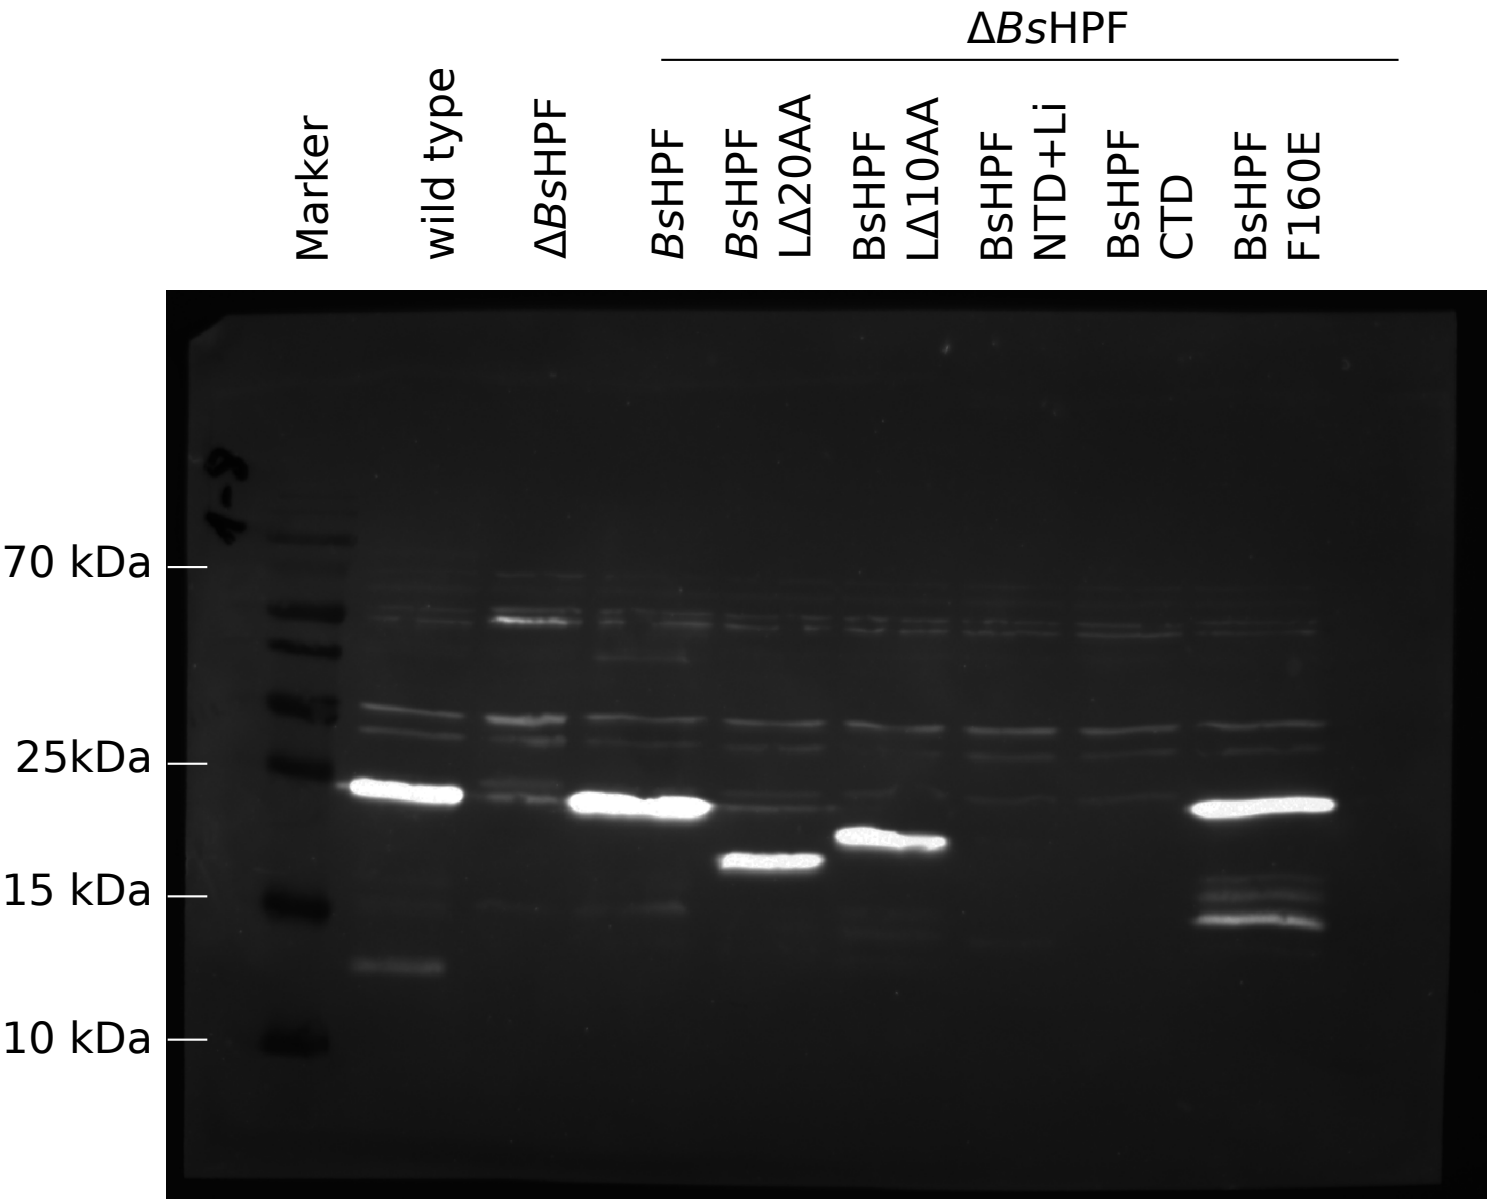

Figure 5B

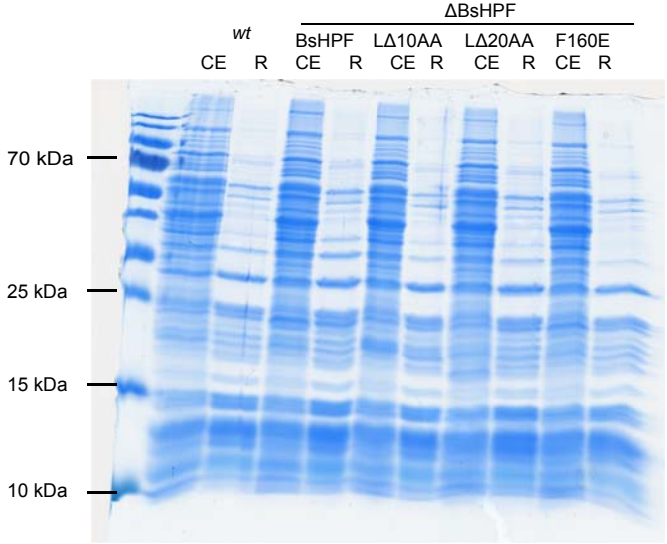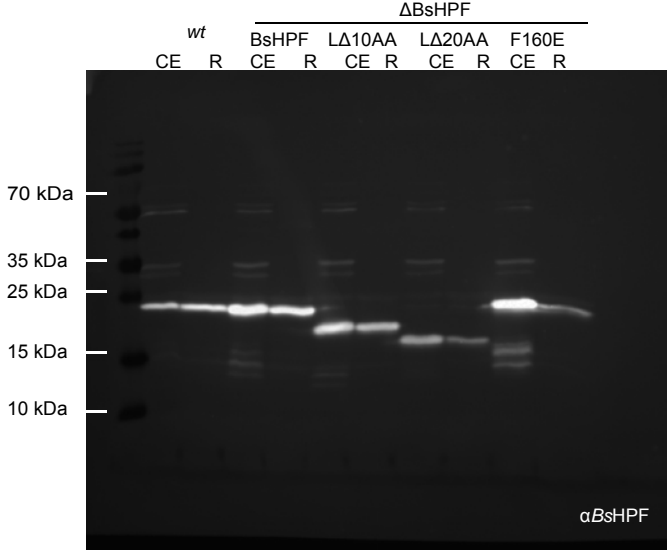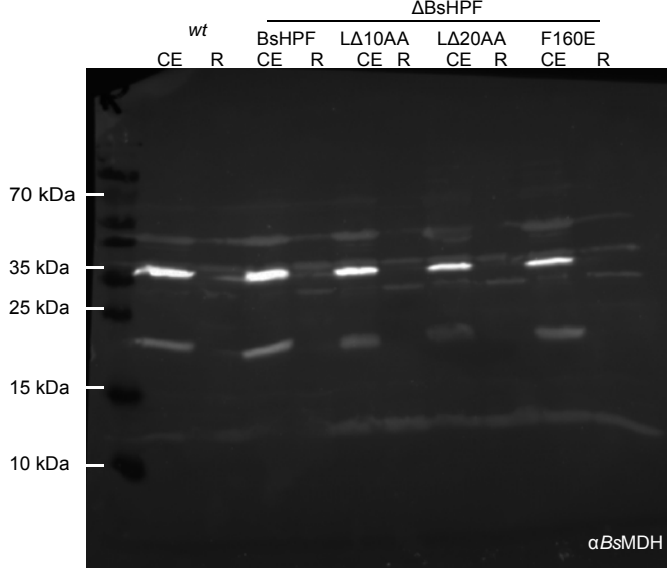

Supplement: EMBJ-36-2061-s005.pdf [file EMBJ-36-2061-s005.pdf]
